# Supplementary material for: New and Preliminary Evidence on Altered Oral and Gut Microbiota in Individuals with Autism Spectrum Disorder (ASD): Implications for ASD Diagnosis and Subtyping Based on Microbial Biomarkers
Source: MDPI journal article supplement (doi:10.3390/nu11092128), 2019-09-06
Supplement: s1 [file s1]

A. Bray-Curtis PCA

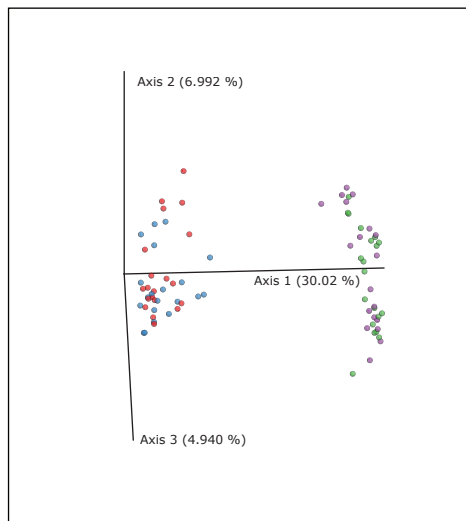

B. Unweighted Unifrac PCA

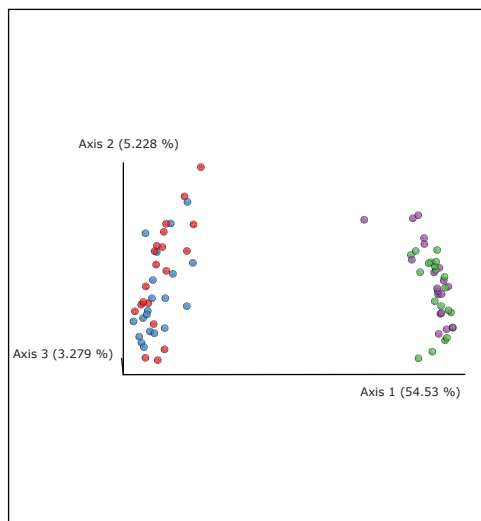

C. Weighted Unifrac PCA

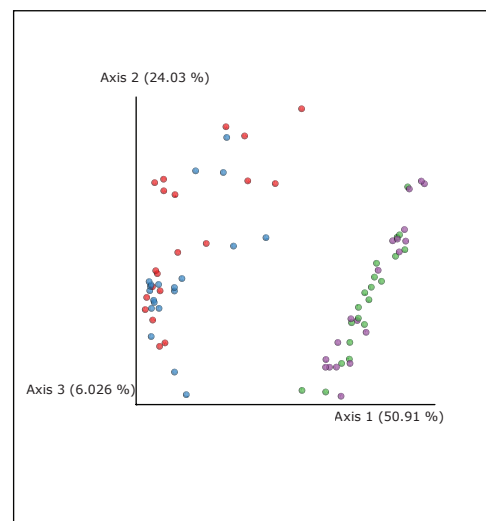

■ Stool\_autism ■ Saliva\_control  
■ Stool\_control ■ Saliva\_autism
