# Supplementary material for: New and Preliminary Evidence on Altered Oral and Gut Microbiota in Individuals with Autism Spectrum Disorder (ASD): Implications for ASD Diagnosis and Subtyping Based on Microbial Biomarkers
Source: MDPI journal article supplement (doi:10.3390/nu11092128), 2019-09-06

Differential abundance of gut microbiome in ASD and control subjects at phylum level

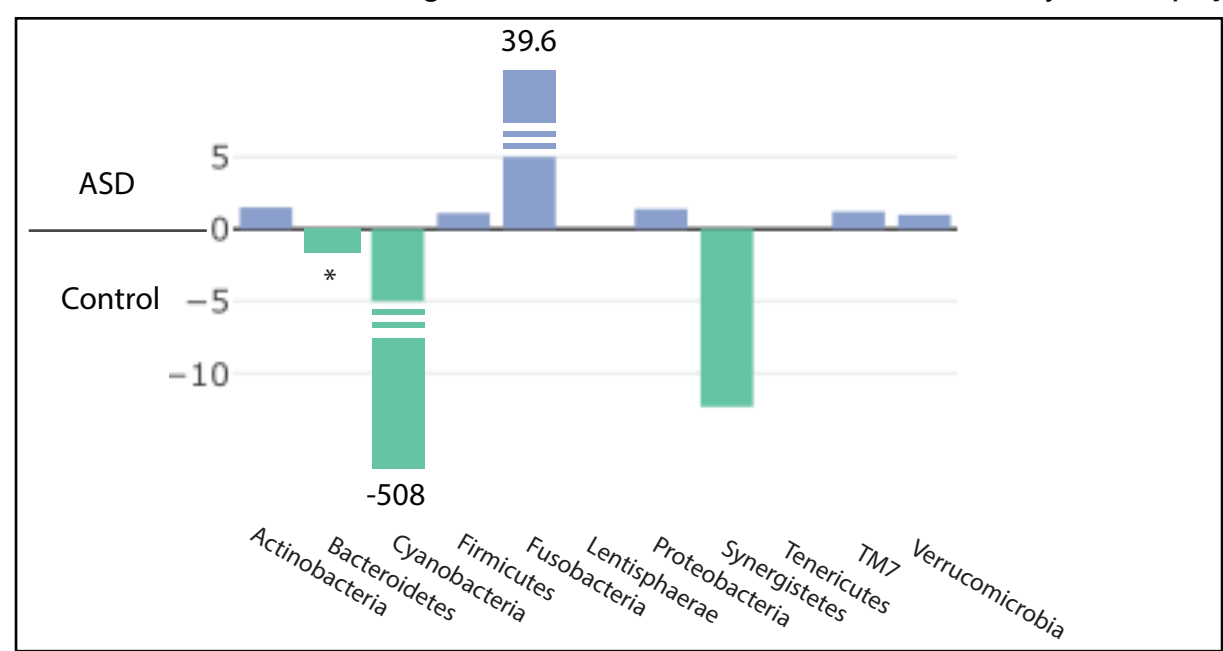

Differential abundance of salivary microbiome in ASD and control subjects at phylum level

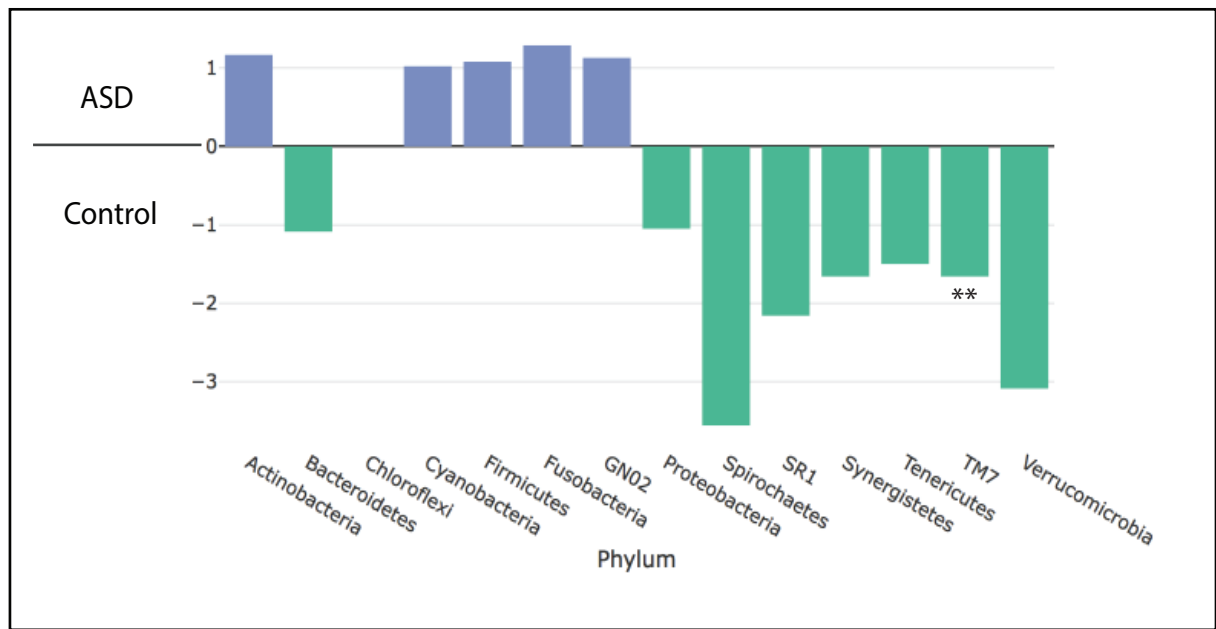

Supplement: s1 [file s1]
