# Supplementary material for: New and Preliminary Evidence on Altered Oral and Gut Microbiota in Individuals with Autism Spectrum Disorder (ASD): Implications for ASD Diagnosis and Subtyping Based on Microbial Biomarkers
Source: MDPI journal article supplement (doi:10.3390/nu11092128), 2019-09-06

### A. Pearson's correlation of salivary Actinobacteria, Bacteroidetes, Firmicutes and Proteobacteria co-occurrence cluster

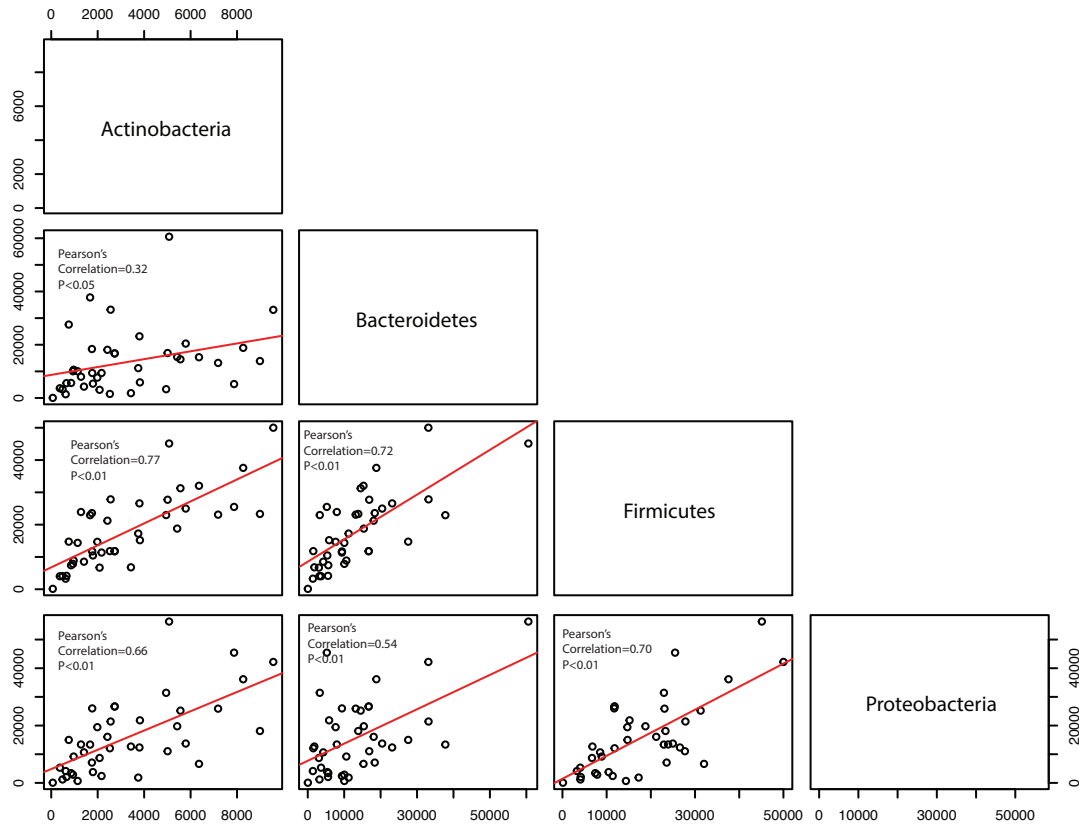

B. Gut and oral microbiome genus level  
SparCC co-occurrence network, Controls (Corr>0.5)

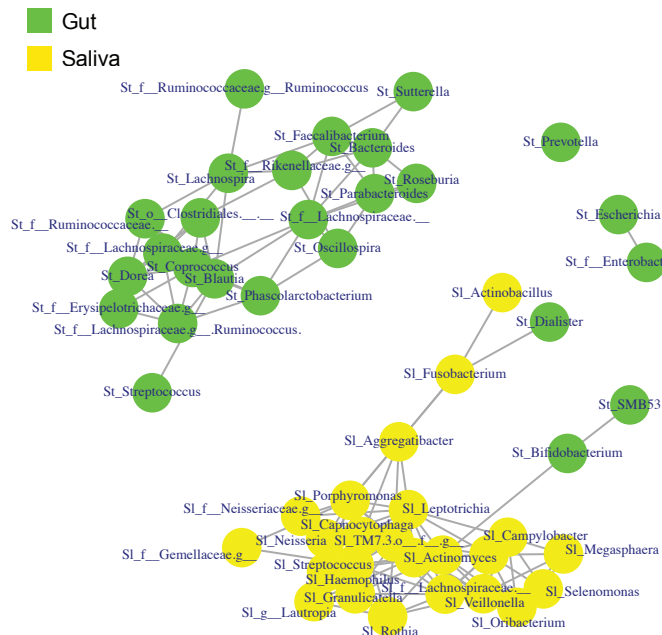

C. Gut and oral microbiome genus level  
SparCC co-occurrence network, ASD (Corr>0.5)

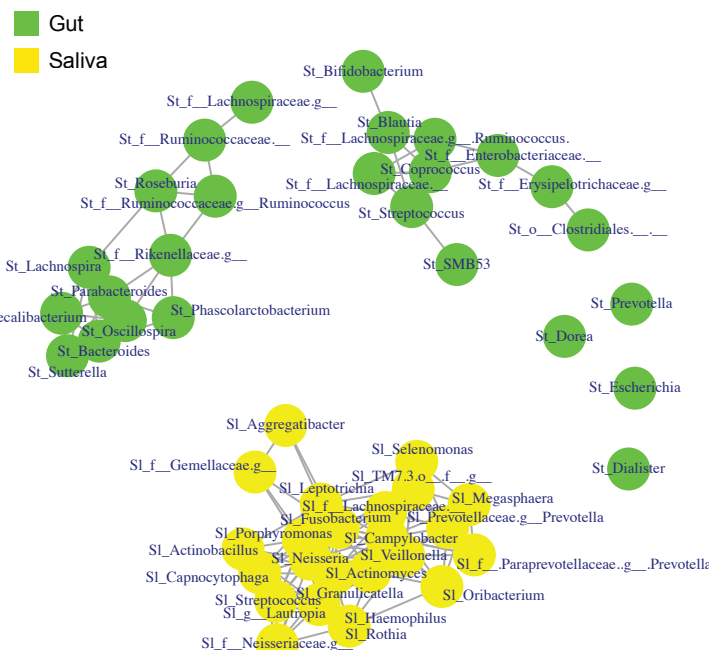

Supplement: s1 [file s1]
