# Supplementary figures and images for: New and Preliminary Evidence on Altered Oral and Gut Microbiota in Individuals with Autism Spectrum Disorder (ASD): Implications for ASD Diagnosis and Subtyping Based on Microbial Biomarkers
Source: MDPI journal article supplement (doi:10.3390/nu11092128), 2019-09-06

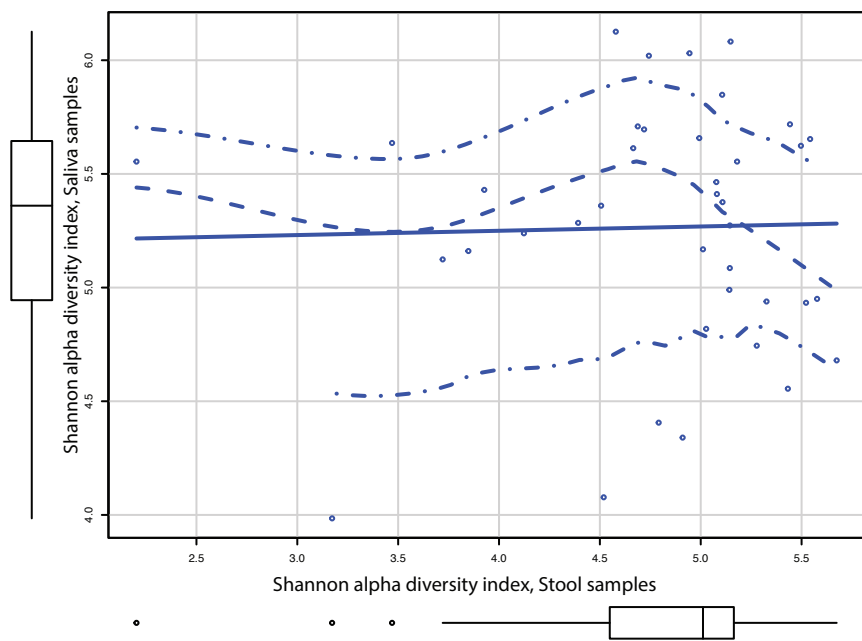

Supplement: s1 [file s1]

A. Control gut vs. saliva ANCOM

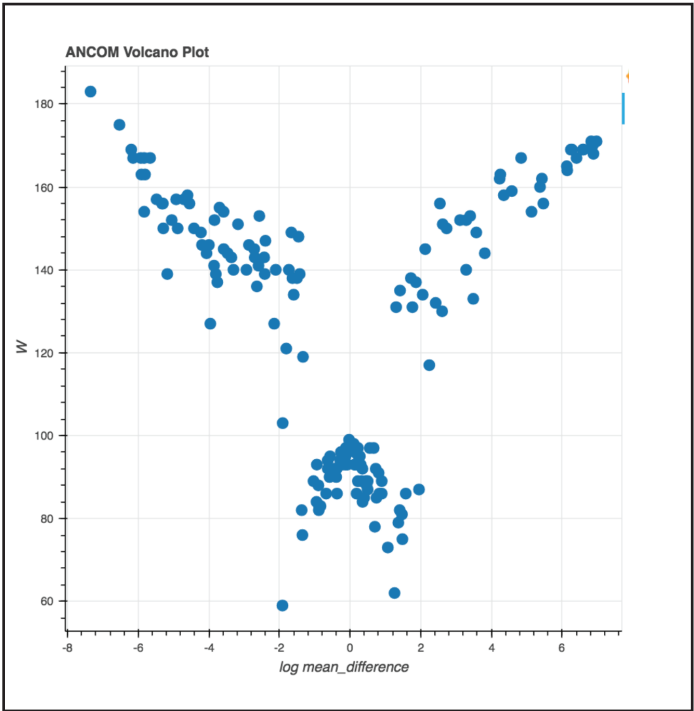

B. ASD gut vs. saliva ANCOM

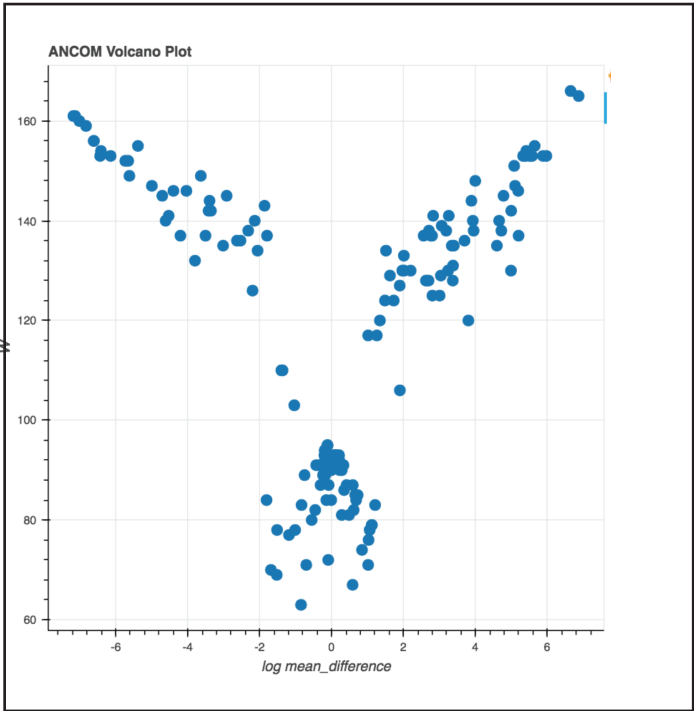

Supplement: s1 [file s1]

Saliva microbiome  
OTU-level relative abundance

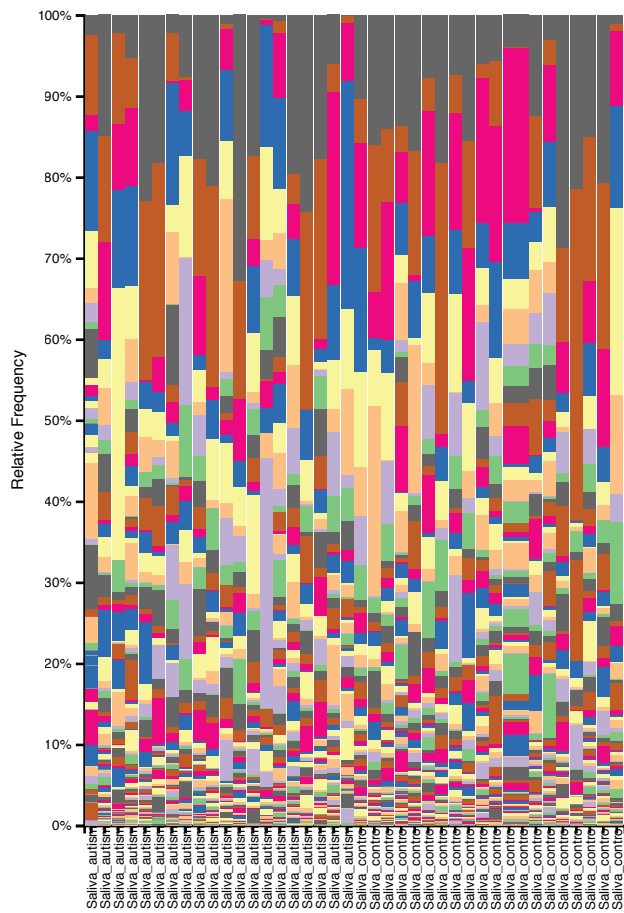

Gut microbiome  
OTU-level relative abundance

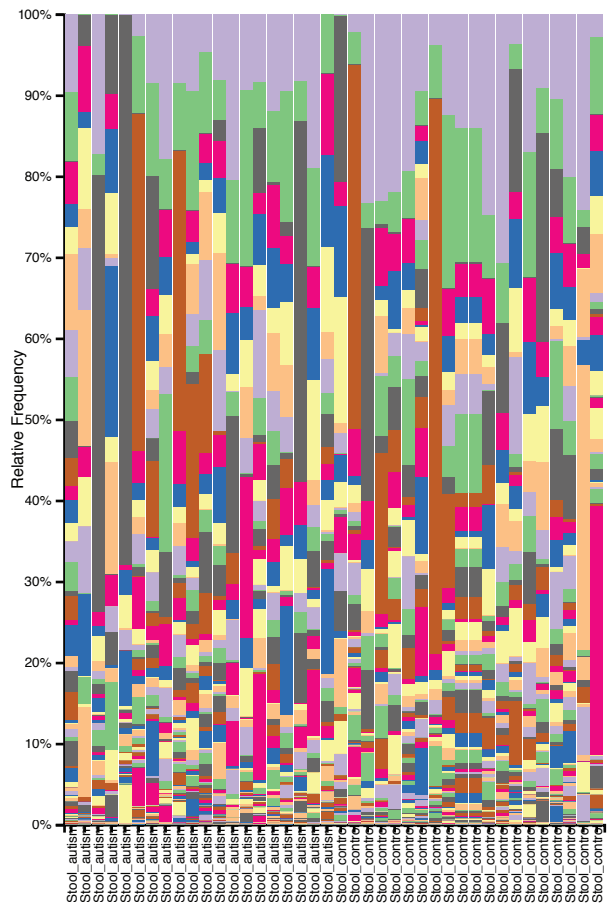

Supplement: s1 [file s1]

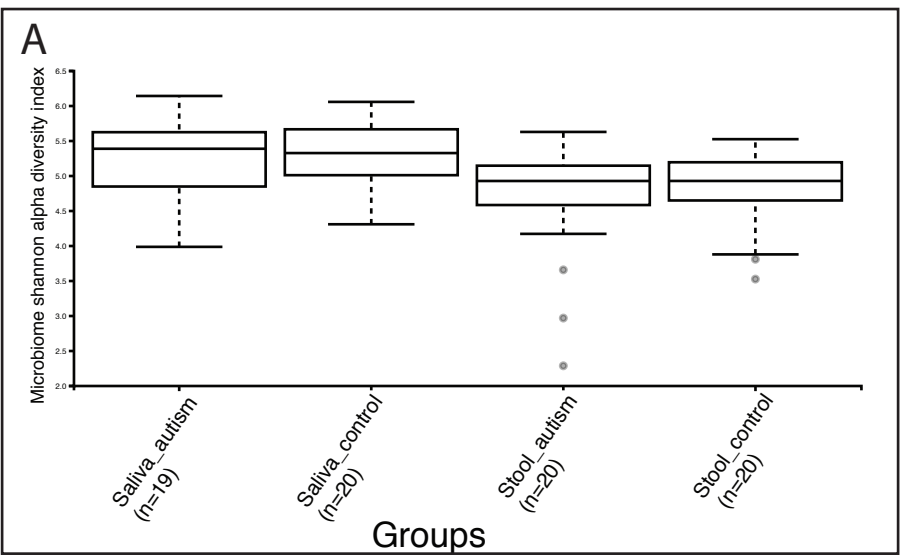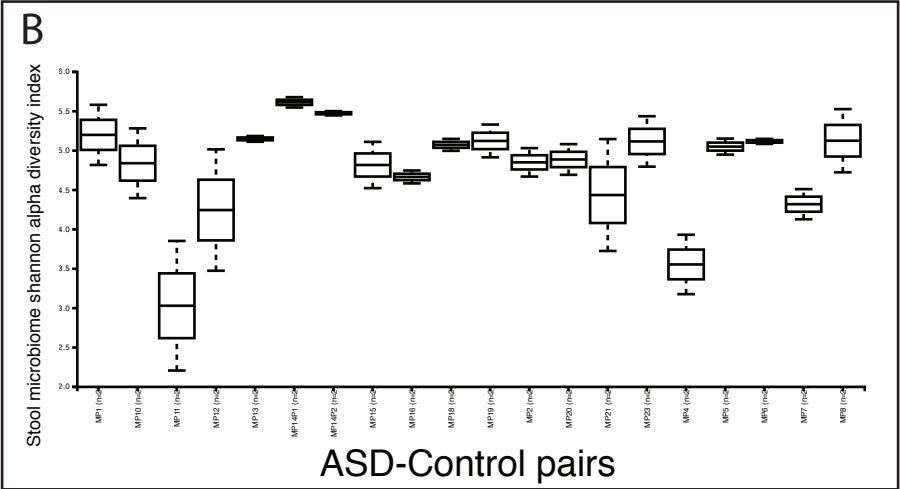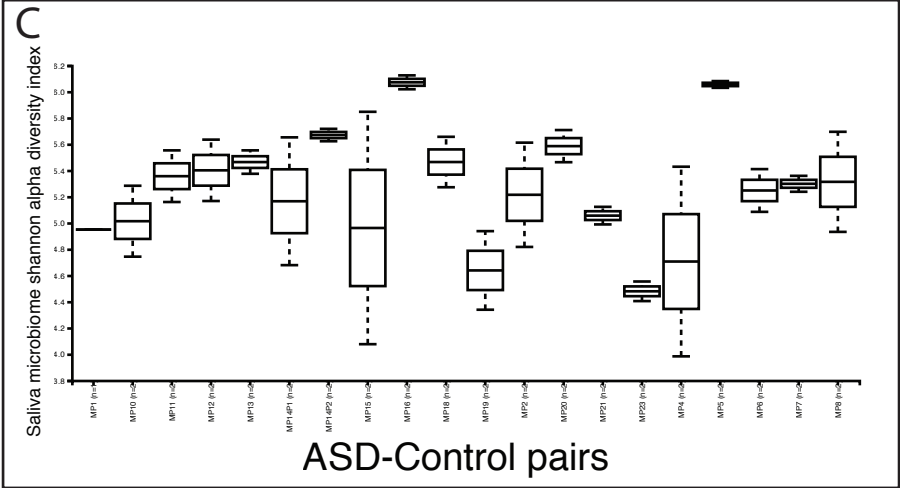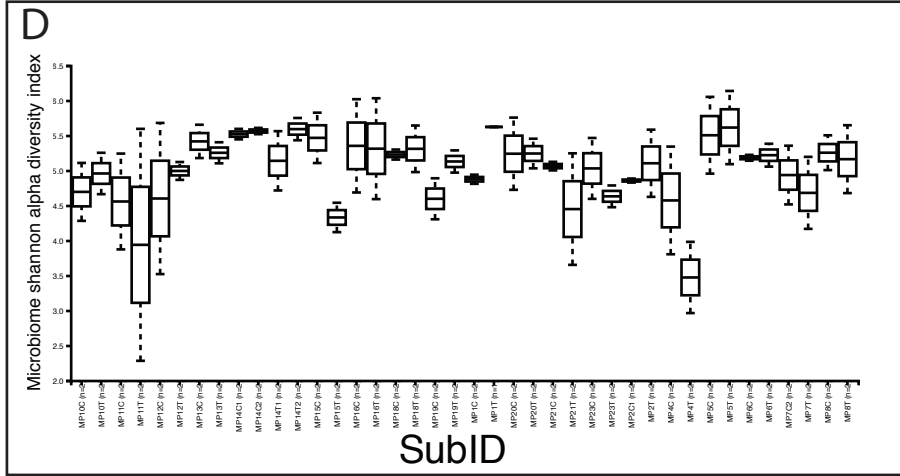

Supplement: s1 [file s1]
